# Supplementary material for: Differential chloride homeostasis in the spinal dorsal horn locally shapes synaptic metaplasticity and modality-specific sensitization
Source: PubMed Central journal article supplement (PMC7414850; doi:10.1038/s41467-020-17824-y), 2020-08-07
Supplement: 41467_2020_17824_MOESM1_ESM.pdf [file 41467_2020_17824_MOESM1_ESM.pdf]

## **Supplementary Information**

Differential chloride homeostasis in the spinal dorsal horn locally shapes synaptic metaplasticity and modality-specific sensitization

---

Ferrini et al.

Nature Communications 2020

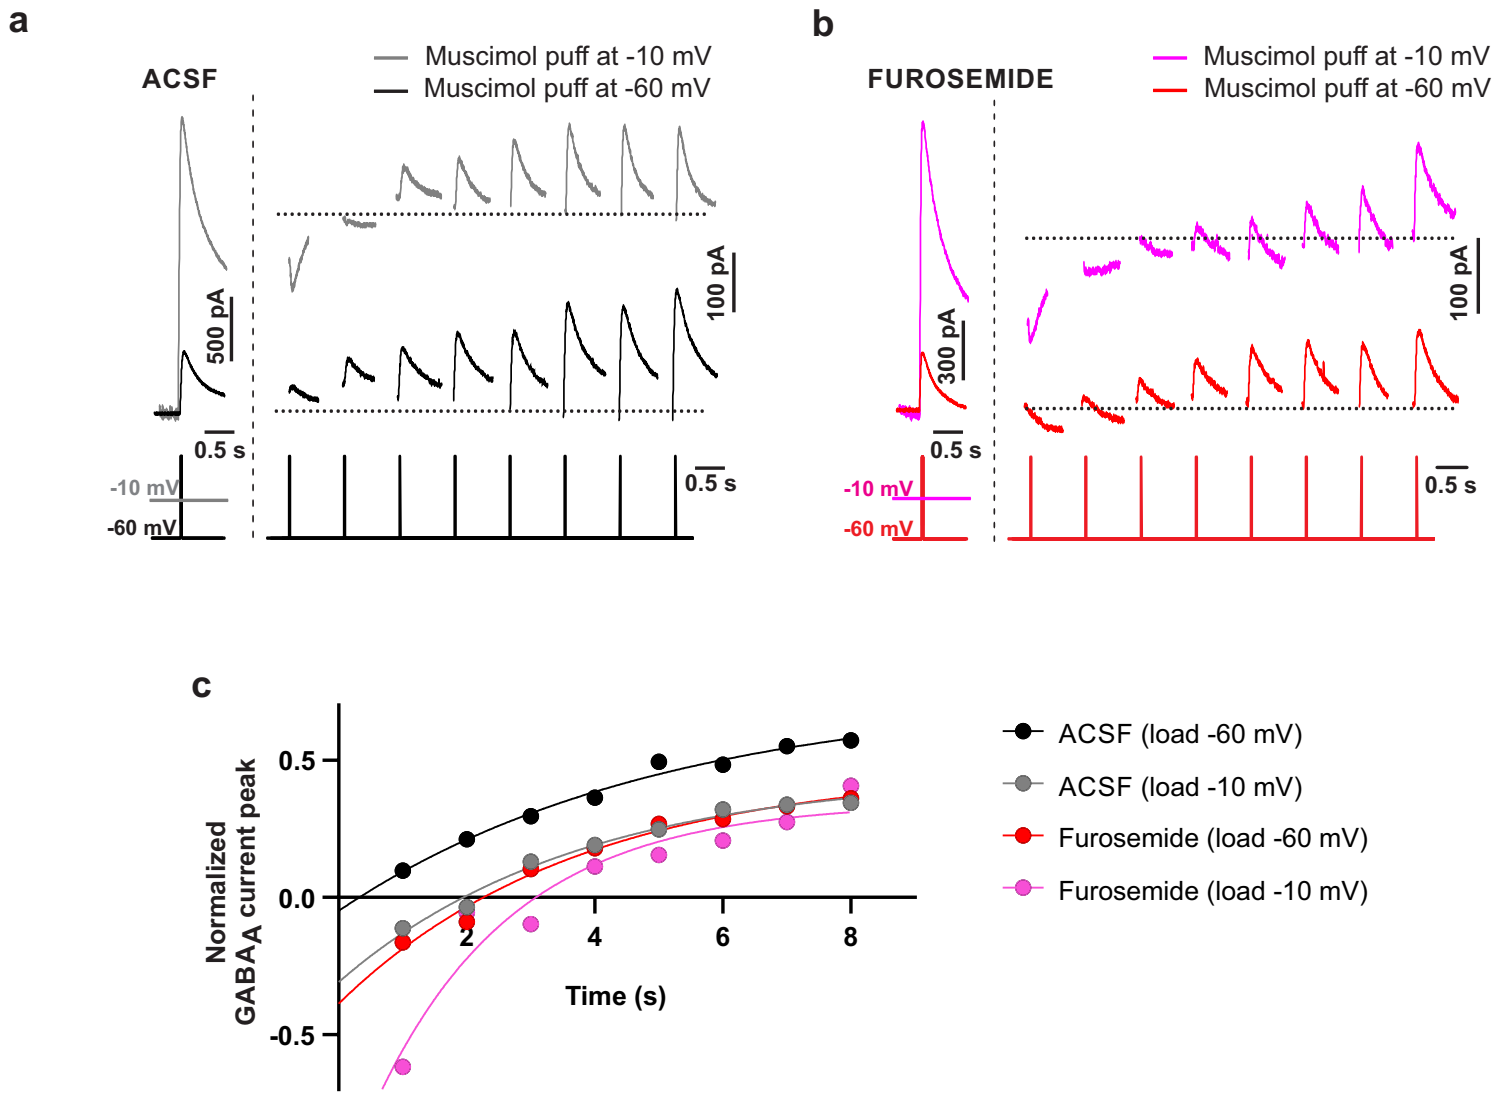

**Supplementary Figure 1. Role of KCC2 in maintaining gradient following a large muscimol-induced conditioning current.** (a) GABA<sub>A</sub> currents evoked by puffing muscimol (500 μM). Currents were recorded with a low Cl<sup>-</sup> (9 mM) pipette solution at regular intervals either following an initial *test stimulus* (muscimol puff) delivered at -60 mV (*black*, Cl<sup>-</sup> driving force is small and Cl<sup>-</sup> influx modest), or following a *conditioning stimulus* (muscimol puff) at -10 mV (*grey*, Cl<sup>-</sup> driving force is large and Cl<sup>-</sup> influx higher). The polarity of GABA<sub>A</sub> currents was measured at increasing intervals, equally spaced by 1 s, following the *test/conditioning stimulus*, for a total of 8 pulses. Each pair of *test/conditioning stimulus* and GABA<sub>A</sub> current was delivered in subsequent trials with 30 s inter-trial interval. The test pulse at -60 mV does not affect the polarity of subsequent GABA<sub>A</sub> currents; conversely, the first GABA<sub>A</sub> current recorded at -60 mV after a large Cl<sup>-</sup> load at -10 mV is inwardly directed. Polarity is quickly restored within 2s. (b) In presence of furosemide (100 μM), even the relatively small Cl<sup>-</sup> influx induced by test stimulus at -60 mV affects the polarity of the subsequent GABA<sub>A</sub> current (*red*). The effect is more dramatic after the conditioning stimulus at 0 mV, after which GABA<sub>A</sub> current is inward for the subsequent 3 seconds and biphasic for additional 2s, indicating a reduced capacity to restore intracellular Cl<sup>-</sup> concentration. (c) Time course of GABA<sub>A</sub> current peak amplitude (normalized to the *test stimulus*) following the *conditioning stimulus*. Abbreviation: ACSF = artificial cerebro-spinal fluid.

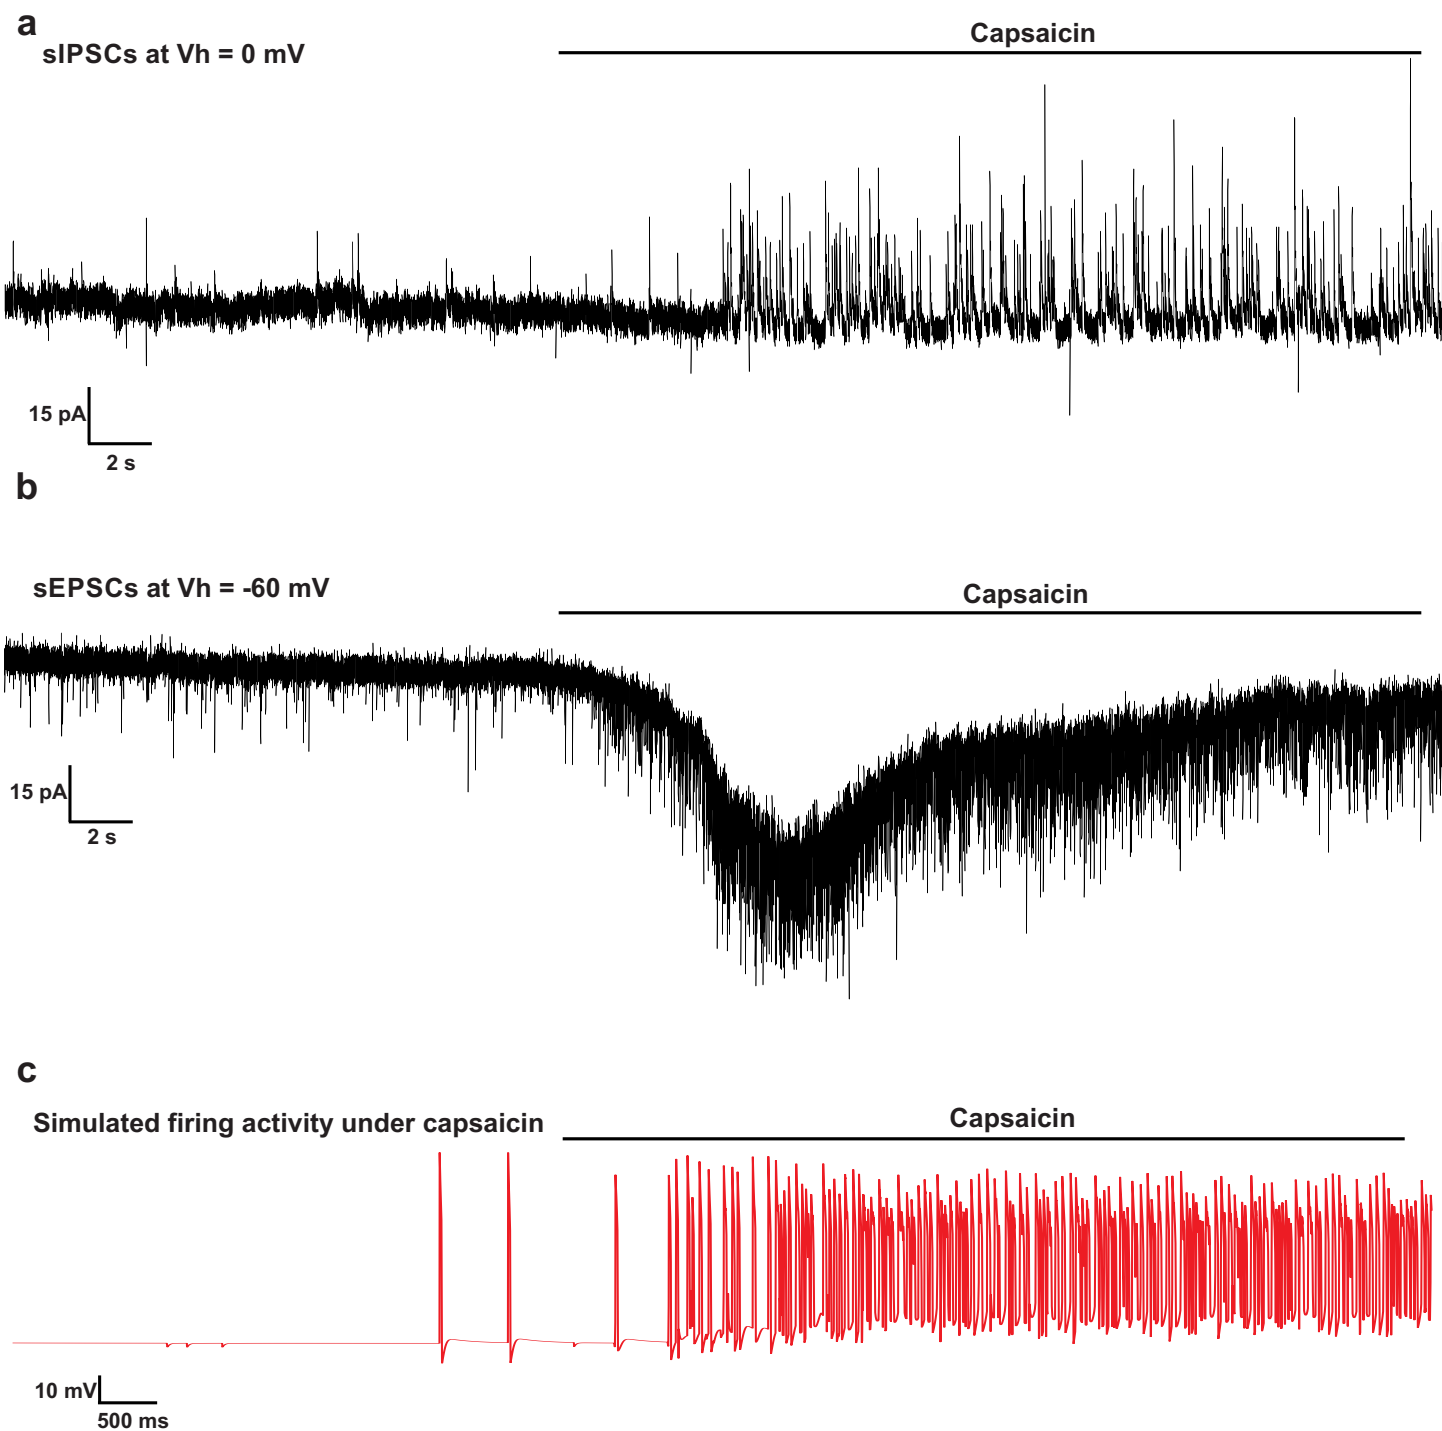

**Supplementary Figure 2.** Increased synaptic activity and firing after capsaicin administration. **(a-b)** Capsaicin administration ( $2 \mu\text{M}$ ) increased both spontaneous inhibitory post-synaptic currents recorded at  $0$  mV **(a)** and excitatory currents at  $-60$  mV **(b)**. **(c)** Sample trace of membrane potential simulated in silico by an electrodiffusion model before and after capsaicin administration. Abbreviations: sIPSCs = spontaneous inhibitory post-synaptic currents, sEPSCs = spontaneous excitatory post-synaptic currents.

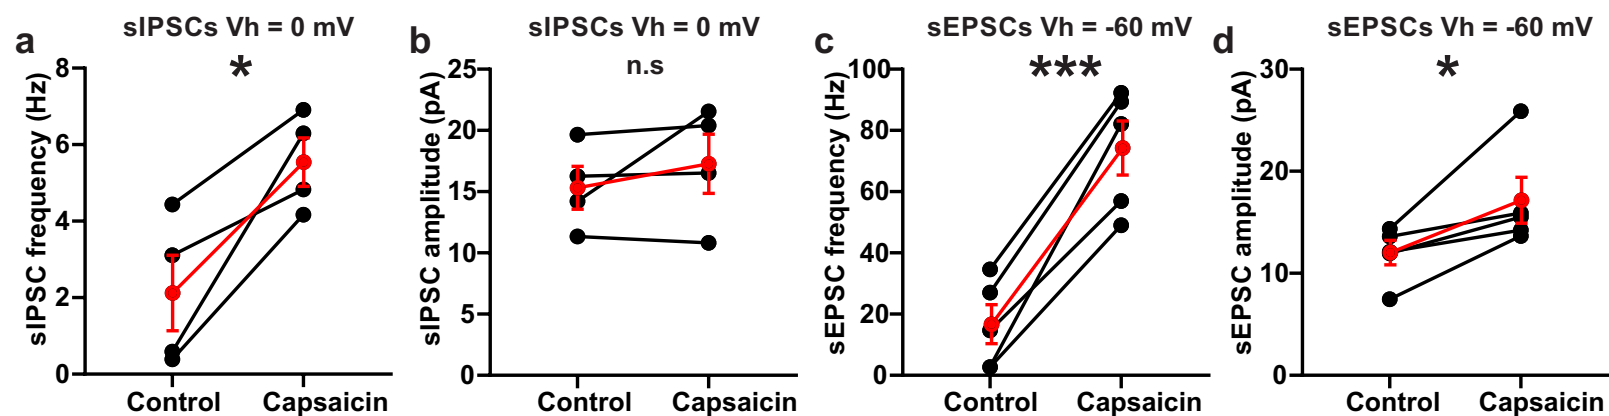

**Supplementary Figure 3. sIPSC and sEPSC frequency and amplitude after capsaicin treatment.** (a-b) sIPSC frequency (a,  $n = 4$ , paired t-test,  $P = 0.03$ ) and amplitude (b,  $n = 4$ , paired t-test,  $P = 0.36$ ) before and after bath-applied capsaicin ( $2 \mu\text{M}$ ). (c-d) sEPSC frequency (c,  $n = 5$ , paired t-test,  $P < 0.001$ ) and amplitude (d,  $n = 5$ , paired t-test,  $P = 0.04$ ) before and after bath-applied capsaicin ( $2 \mu\text{M}$ ). Abbreviations: sIPSCs = spontaneous inhibitory post-synaptic currents, sEPSCs = spontaneous excitatory post-synaptic currents, n.s. = not significant. Data are shown as mean  $\pm$  S.E.M. \* $P < 0.05$ , \*\*\* $P < 0.001$ .

C57Bl6 mice

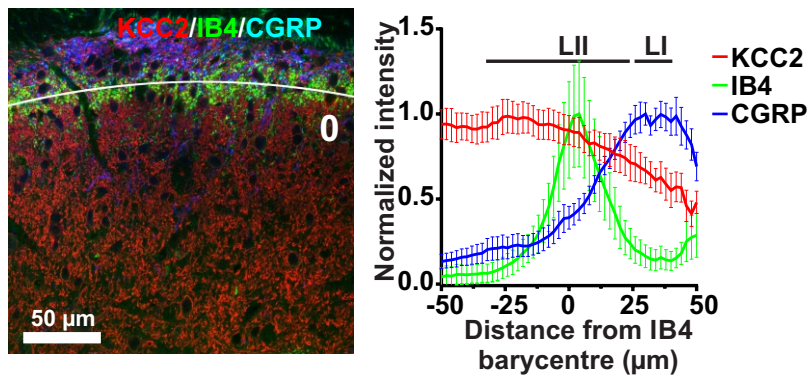

**Supplementary Figure 4. Interlaminar gradient of KCC2 in the mouse superficial spinal dorsal horn.** Triple fluorescence staining for CGRP (*blue*), IB4 (*green*) and KCC2 (*red*) in the mouse SDH. The *white line* represents the barycentric origin (0) of IB4 staining. In the histogram, CGRP, IB4 and KCC2 mean fluorescence intensities in the SDH are reported as a function of the position towards the IB4 barycentre (lamina I average fluorescence intensity  $411 \pm 57$  i.u., lamina II  $581 \pm 60$  i.u.,  $n = 8$ , paired t-test  $P < 0.001$ ). Abbreviations: i.u. = intensity unit, CGRP = calcitonin gene-related peptide, IB4 = isolectin B4. Data are shown as mean  $\pm$  S.E.M.

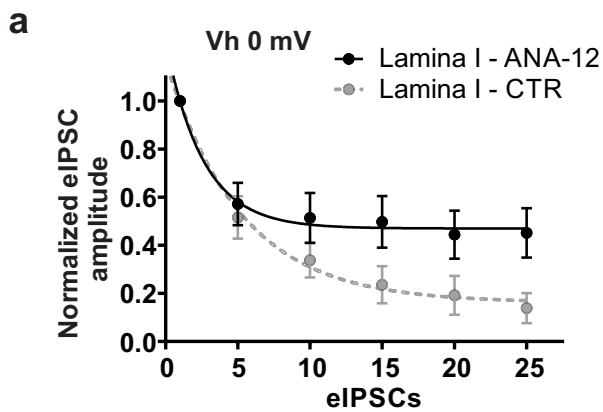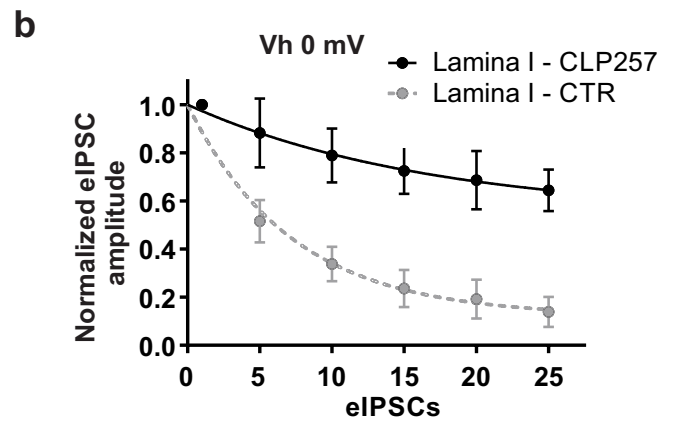

**Supplementary Figure 5. Enhancing KCC2 prevents activity-dependent collapse of inhibition in lamina I.** (a) Depression of eIPSC amplitudes in lamina I during 20 Hz repetitive stimulation following ANA-12 treatment (1  $\mu$ M, 2 hours – n = 6, *solid line*). For comparison, the lamina I depression in control (Fig. 6b) is also shown (*dashed line*). (b) Depression of eIPSC amplitudes in lamina I during 20 Hz repetitive stimulation following CLP257 treatment (5  $\mu$ M, 2 hours – n = 5, *solid line*). For comparison, the lamina I depression in control (Fig. 6b) is also shown (*dashed line*). Abbreviations: ANA-12 = N-[2-[[[Hexahydro-2-oxo-1H-azepin-3-yl)amino]carbonyl]phenyl]benzo[b]thiophene-2-carboxamide, eIPSCs = evoked inhibitory post-synaptic currents. Data are shown as mean  $\pm$  S.E.M.

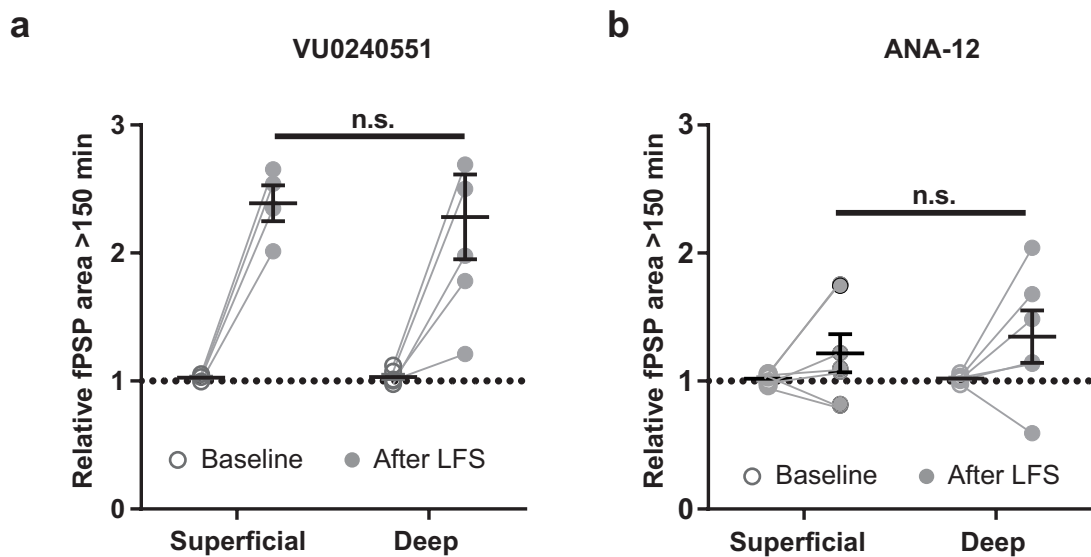

**Supplementary Figure 6. Differences in LTF in superficial and deep recordings were abolished by VU0240551 and ANA-12 treatments.** (a) Low frequency stimulation (LFS) produced similar *runaway* increase in fPSP responses in superficial ( $n = 5$ ) and deep recordings ( $n = 5$ ) after blocking KCC2 activity with VU0240551 ( $10 \mu\text{M}$ ; Two-way-RM-ANOVA,  $F_{\text{interaction}} = 0.1$ ,  $P = 0.8$ ). (b) ANA-12 ( $1 \mu\text{M}$ ) administration produced similar increase of fPSP responses in superficial ( $n = 7$ ) and deep ( $n = 6$ ; Two-way-RM-ANOVA,  $F_{\text{interaction}} = 0.3$ ,  $P = 0.6$ ) recordings 150 min after LFS. Individual experiments are depicted in grey. Abbreviations: n.s. = not significant. Data are shown as mean  $\pm$  S.E.M.

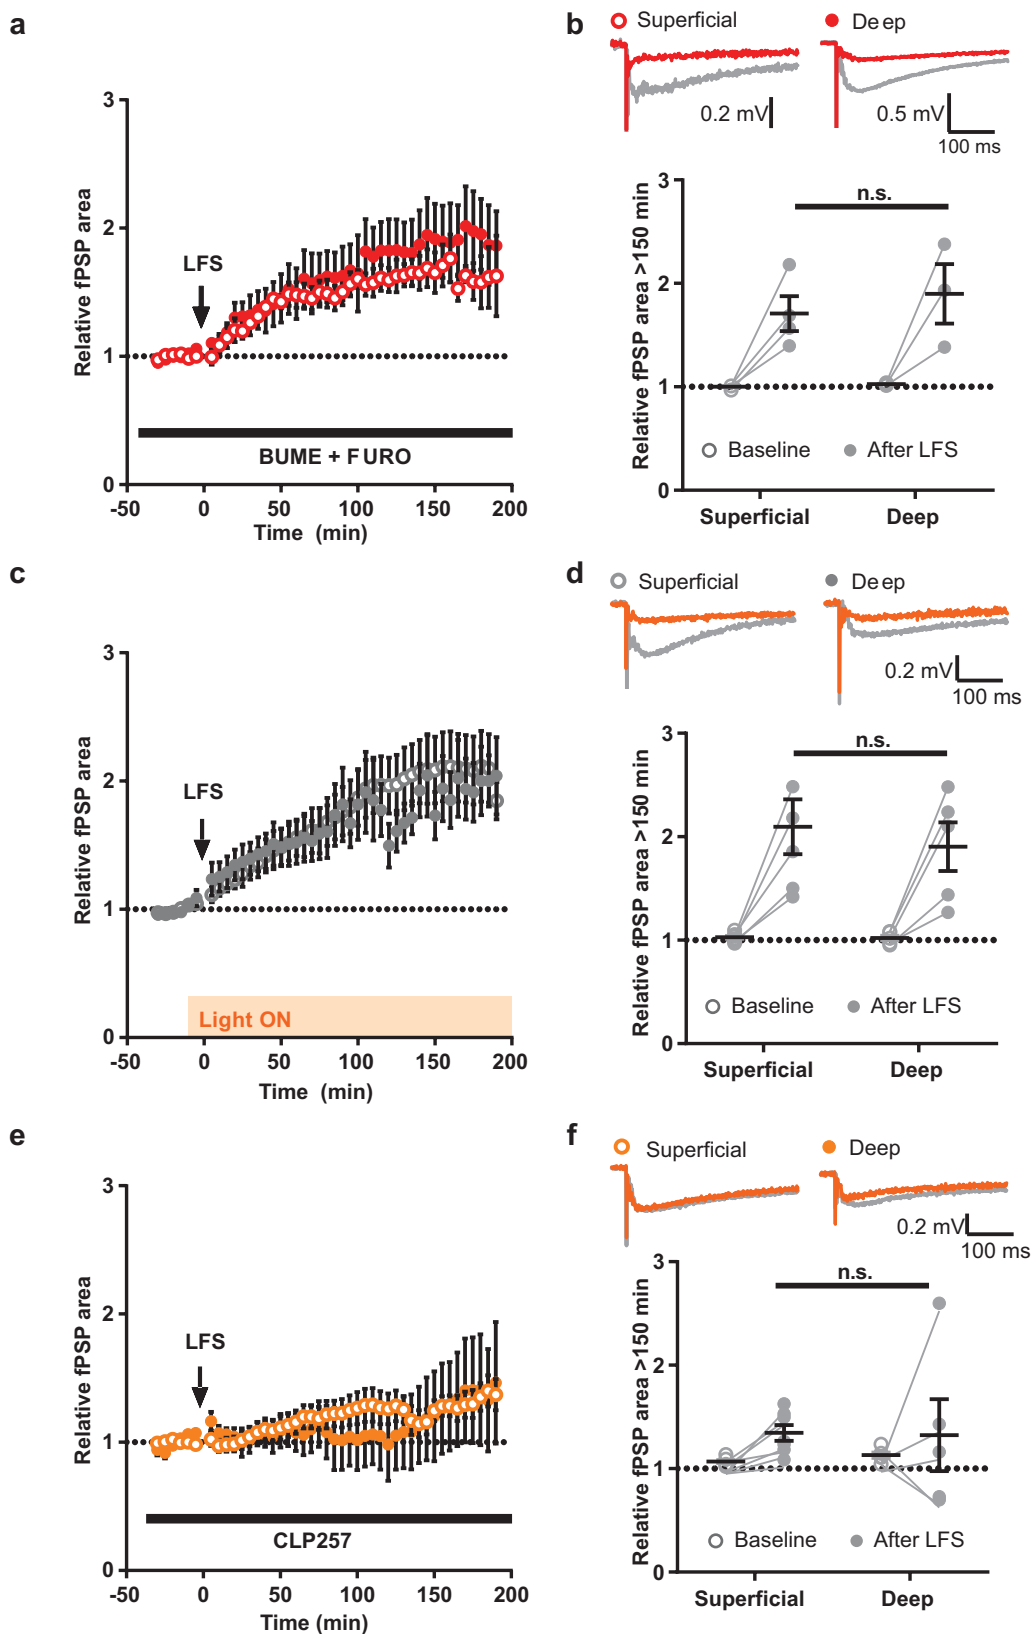

**Supplementary Figure 7. Increased chloride loading in lamina I leads to an unconstrained LTF.** (a) LFS-induced increase of fPSP responses in superficial and deep recordings with furosemide (100  $\mu$ M) treatment in explants continuously treated with bumetanide (10  $\mu$ M; Two-way-RM-ANOVA  $F_{\text{interaction}} = 0.5$ ,  $P = 0.9$ ). Arrow shows the time of LFS application. (b) LFS produced a similar increase in fPSP responses in superficial ( $n = 4$ ) and deep ( $n = 3$ ) recordings after 150 min under bumetanide and furosemide administration (Two-way-RM-ANOVA,  $F_{\text{interaction}} = 0.3$ ,  $P = 0.6$ ). Insets on top show representative traces of fPSP responses during baseline (red) and 150 min after LFS (grey). (c) LFS-induced increase of fPSP responses in superficial and deep recordings with  $\text{Cl}^-$  loading in spinal cord neurons by optogenetic-activation of the chloride-pump NpHR3.0 (Two-way-RM-ANOVA,  $F_{\text{interaction}} = 0.8$ ,  $P = 0.6$ ). (d) NpHR3.0-induced  $\text{Cl}^-$  loading produced similar increase in fPSP responses in superficial ( $n = 6$ ) and deep ( $n = 5$ ) recordings after 150 min of LFS (Two-way-RM-ANOVA,  $F_{\text{interaction}} = 0.3$ ,  $P = 0.6$ ). Representative traces are shown on top. (e) LFS-induced increase of fPSP responses in superficial and deep recordings with CLP257 (5  $\mu$ M) administration (Two-way-RM-ANOVA,  $F_{\text{interaction}} = 0.6$ ,  $P = 0.9$ ). (f) CLP257 decreased synaptic plasticity in superficial recordings ( $n = 7$ ), similar to deep recordings ( $n = 5$ ) 150 min of LFS (Two-way-RM-ANOVA,  $F_{\text{interaction}} = 0.1$ ,  $P = 0.8$ ). Representative traces are shown on top. Individual experiments are depicted in grey. Abbreviations: LFS = low frequency stimulation, n.s. = not significant. Data are shown as mean  $\pm$  S.E.M.



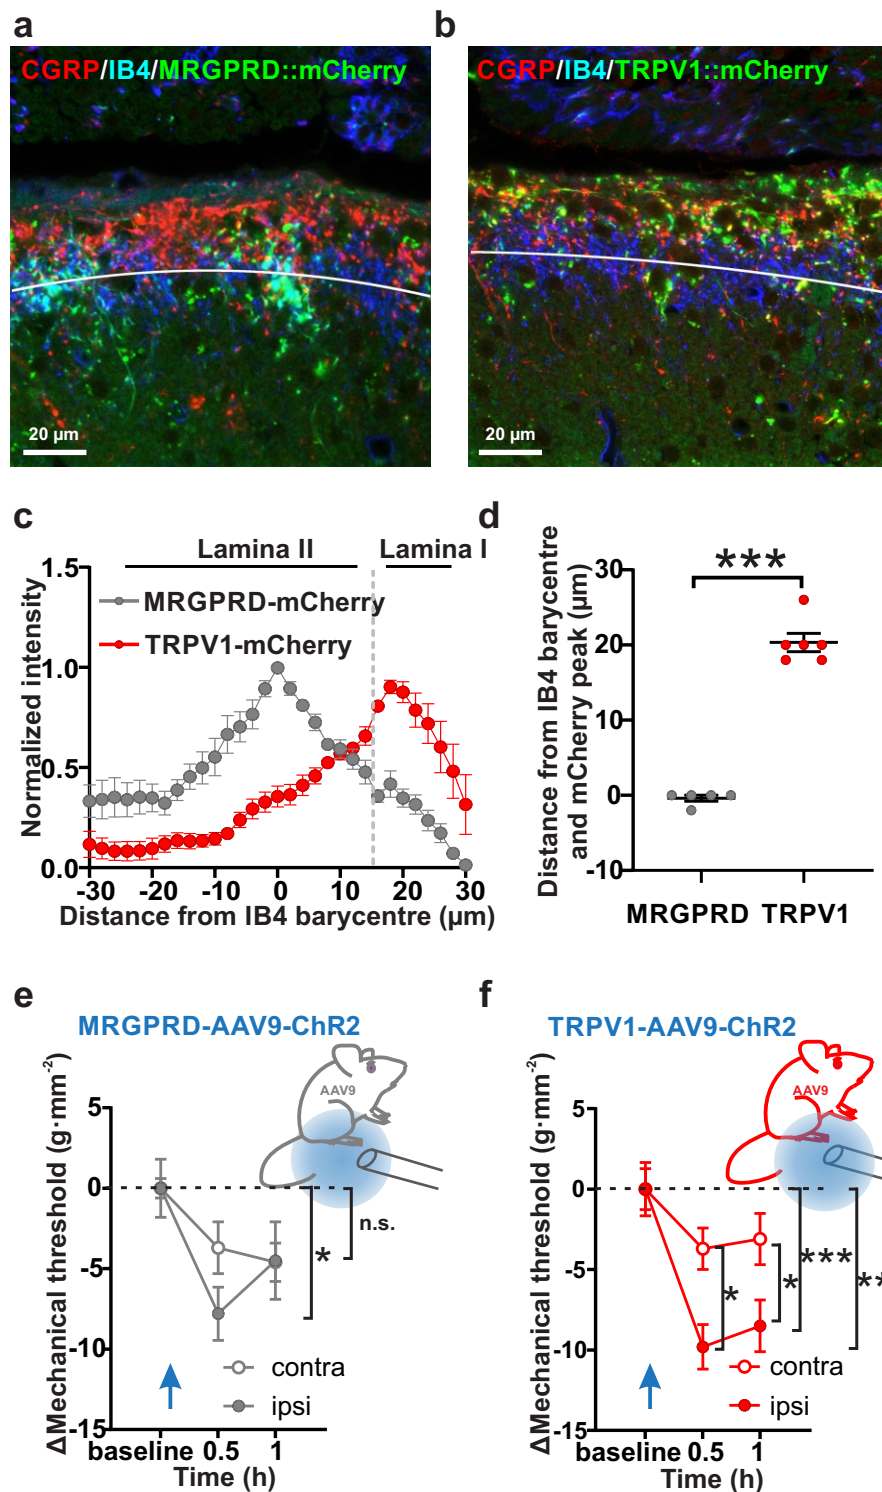

**Supplementary Figure 8. Modality-specific nociceptive processing assessed by viral delivery of Cre-dependent ChR2.** (a-b) Confocal images of the distribution of postnatal mCherry<sup>+</sup> projections in the superficial dorsal horn of AAV9-FLEX-rev-ChR2(H134R)-mCherry-injected MRGPRD-Cre (a) and TRPV1-Cre (b) mice. Laminar boundaries were determined by CGRP (red) and IB4 (blue) staining. The white line represents the IB4 barycentre in the SDH. (c) Distribution of mCherry<sup>+</sup> fluorescence intensity from 5 MRGPRD-ChR2 and 6 TRPV1-ChR2 as a function of the IB4 barycentre (white line). Dashed line indicates the boundary between lamina I and II. (d) The peak of mCherry-intensity associated to MRGPRD afferents (grey) is closer to the IB4 barycentre (lamina II) than TRPV1 afferents (red; t-test,  $P < 0.001$ ). (e-f) Time course of mechanical sensitization induced by blue light illumination (5 min, 2 Hz) of the hind paw in MRGPRD-ChR2 (e,  $n = 6$ ; Two-way-RM-ANOVA,  $F_{\text{time}} = 6.0$ ,  $P = 0.007$ ) and TRPV1-ChR2 mice (f,  $n = 9$ ; Two-way-RM-ANOVA,  $F_{\text{time}} = 12.0$ ,  $P < 0.001$ ). The insets schematically illustrate the experimental procedure. Abbreviations: i.u. = intensity units, CGRP = calcitonin gene-related peptide, IB4 = isolectin B4, MRGPRD = mas-related G-protein coupled receptor member D, TRPV1 = Transient receptor potential vanilloid 1, ChR2 = channelrhodopsin 2, AAV9 = adeno-associated virus serotype 9, contra = contralateral, ipsi = ipsilateral. Data are expressed as mean  $\pm$  S.E.M. \* $P < 0.05$ , \*\*\* $P < 0.001$ .
